# Supplementary material for: Advanced materials for micro/nanorobotics
Source: Royal Society of Chemistry journal article supplement (doi:10.1039/d3cs00777d), 2024-01-01
Supplement: d3cs00777d1.pdf [file d3cs00777d1.pdf]

## Supplementary Information

# Advanced materials for micro/nanorobotics

*Jeonghyo Kim,<sup>†a</sup> Paula Mayorga-Burrezo,<sup>†b</sup> Su-Jin Song,<sup>†a</sup> Carmen C. Mayorga-Martinez,<sup>a</sup> Mariana Medina-Sánchez,<sup>c,d,e,f</sup> Salvador Pané,<sup>g</sup> and Martin Pumera<sup>\*a,b,h,i</sup>*

<sup>a</sup>. Advanced Nanorobots & Multiscale Robotics Laboratory, Faculty of Electrical Engineering and Computer Science, VSB – Technical University of Ostrava, 17. listopadu 2172/15, Ostrava 70800, Czech Republic

<sup>b</sup>. Future Energy and Innovation Laboratory, Central European Institute of Technology, Brno University of Technology, Purkyňova 123, Brno 61200, Czech Republic

<sup>c</sup>. CIC NanoGUNE BRTA, Tolosa Hiribidea 76, San Sebastián, 20018, Spain

<sup>d</sup>. IKERBASQUE, Basque Foundation for Science, Plaza Euskadi, 5, Bilbao, 48009, Spain

<sup>e</sup>. Micro- and NanoBiomedical Engineering Group (MNBE), Institute for Integrative Nanosciences, Leibniz Institute for Solid State and Materials Research (IFW), 01069, Dresden, Germany

<sup>f</sup>. Chair of Micro- and NanoSystems, Center for Molecular Bioengineering (B CUBE), Dresden University of Technology, 01062, Dresden, Germany

<sup>g</sup>. Multi-Scale Robotics Lab, Institute of Robotics and Intelligent Systems, ETH Zürich, Tannenstrasse 3, CH-8092 Zürich, Switzerland

<sup>h</sup>. Department of Chemical and Biomolecular Engineering, Yonsei University, 50 Yonsei-ro, Seodaemun-gu, Seoul 03722, Korea

<sup>i</sup>. Department of Medical Research, China Medical University Hospital, China Medical University, No. 91 Hsueh-Shih Road, Taichung, Taiwan

<sup>†</sup>These authors contributed equally to this work.

\*Corresponding author: martin.pumera@vsb.cz, pumera.research@gmail.com

## TABLE OF CONTENTS

1. **Table S1.** 2D materials-integrated micro/nanorobots
2. **Table S2.** ZIF type MOF-based micro/nanorobots
3. **Table S3.** UiO type MOF-based micro/nanorobots
4. **Table S4.** MIL type MOF-based micro/nanorobots
5. **Table S5.** Semiconducting metal oxides-based micro/nanorobots
6. **Table S6.** Semiconducting ternary metal oxides-based micro/nanorobots
7. **Table S7.** Semiconducting quantum dot (QD)- and metal chalcogenide-based micro/nanorobots
8. **Table S8.** Polymer-based micro/nanorobots
9. **Table S9.** Biological cell hybrid micro/nanorobots
10. **Table S10.** Advanced material-based micro/nanorobots: various designs, fabrication techniques, and size ranges
11. **Table S11.** Advanced material-based micro/nanorobots: comparison of speed by different energy sources

**Table S1.** 2D materials-integrated micro/nanorobots

|                                          | Composition and types                                                                                         | Powering mechanisms (Sources)                                              | Active component                                                                                     | 2D materials functionalities                                     | Application (targets)                            | Ref. |
|------------------------------------------|---------------------------------------------------------------------------------------------------------------|----------------------------------------------------------------------------|------------------------------------------------------------------------------------------------------|------------------------------------------------------------------|--------------------------------------------------|------|
| TMDs (MoS <sub>2</sub> )                 | MoS <sub>2</sub> /Pt, MoS <sub>2</sub> /Au tubular                                                            | Catalytic (H <sub>2</sub> O <sub>2</sub> )                                 | Pt, Au                                                                                               | Bio-interactive surfaces, quencher, drug loading                 | Biosensing (miRNA-21, thrombin)<br>Drug delivery | 1    |
|                                          | MoS <sub>2</sub> /TiO <sub>2</sub> microsphere                                                                | Light ( $\lambda = n.s.$ )                                                 | MoS <sub>2</sub> /TiO <sub>2</sub>                                                                   | Velocity enhancement, broaden absorption                         | Pathogen eradication (E. coli)                   | 2    |
|                                          | S. platensis/Fe <sub>3</sub> O <sub>4</sub> /MoS <sub>2</sub> /Au helical                                     | Rotational magnetic field                                                  | Fe <sub>3</sub> O <sub>4</sub>                                                                       | Photothermal conversion (photo absorbent)                        | Photothermal cell ablation (MG-63 cell)          | 3    |
| TMDs (WS <sub>2</sub> )                  | WS <sub>2</sub> microsphere                                                                                   | Light ( $\lambda = 385$ nm, 475 nm, 550 nm, 621 nm)                        | WS <sub>2</sub>                                                                                      | Photothermal conversion                                          | -                                                | 4    |
|                                          | WS <sub>2</sub> /Pt, MoS <sub>2</sub> /Pt tubular                                                             | Catalytic (H <sub>2</sub> O <sub>2</sub> )                                 | Pt                                                                                                   | Bio-interactive surfaces, quencher                               | Biosensing (Endotoxins, LPS)                     | 5    |
|                                          | PCL/Pt/Fe/WS <sub>2</sub> microsphere                                                                         | Catalytic (H <sub>2</sub> O <sub>2</sub> )<br>Magnetic                     | Pt, Fe                                                                                               | Bio-interactive surfaces, quencher                               | Biosensing (Endotoxins, LPS)                     | 6    |
|                                          | WS <sub>2</sub> /Ni/Pt tubular                                                                                | Catalytic (H <sub>2</sub> O <sub>2</sub> )<br>Magnetic                     | Pt, Ni                                                                                               | NIR-photocatalytic activity                                      | Photodegradation (Remazol Brilliant Blue R)      | 7    |
|                                          | WS <sub>2</sub> -PANI/Pt tubular                                                                              | Catalytic (H <sub>2</sub> O <sub>2</sub> )                                 | Pt                                                                                                   | Capacitive enhancement, on-demand delivery                       | On-demand circuit configuration                  | 8    |
| MXenes (Ti <sub>3</sub> C <sub>2</sub> ) | TiO <sub>2</sub> -Ti <sub>3</sub> C <sub>2</sub> /Pt 2D sheet                                                 | Light ( $\lambda = 365$ nm),<br>Catalytic (H <sub>2</sub> O <sub>2</sub> ) | TiO <sub>2</sub> -Ti <sub>3</sub> C <sub>2</sub> /Pt                                                 | UV light-driven propulsion, on-off motion, photodegradation      | Photodegradation (TNT)                           | 9    |
|                                          | Ti <sub>3</sub> C <sub>2</sub> T <sub>x</sub> -Pt/TiO <sub>2</sub> /γ-Fe <sub>2</sub> O <sub>3</sub> 2D sheet | Light ( $\lambda = 365$ nm),<br>magnetic                                   | Ti <sub>3</sub> C <sub>2</sub> T <sub>x</sub> -Pt/TiO <sub>2</sub> /γ-Fe <sub>2</sub> O <sub>3</sub> | UV light-driven propulsion, on-off motion, electrostatic capture | Sensing (Nanoplastic, PS nanobeads)              | 10   |
| Xenes (2D As)                            | 2D As-Pt 2D sheet                                                                                             | Catalytic (H <sub>2</sub> O <sub>2</sub> )                                 | Pt                                                                                                   | Drug loading                                                     | Drug delivery                                    | 11   |
| Xenes (BP)                               | BP-Pt microtubes                                                                                              | Catalytic (H <sub>2</sub> O <sub>2</sub> )                                 | Pt                                                                                                   | Velocity enhancement                                             | -                                                | 12   |
|                                          | PS/BP/Pt/Fe <sub>2</sub> O <sub>3</sub> microsphere                                                           | Catalytic (H <sub>2</sub> O <sub>2</sub> )<br>Magnetic                     | Pt, Fe <sub>2</sub> O <sub>3</sub>                                                                   | Bio-interactive surfaces, quencher                               | Biosensing (Cholera Toxin B)                     | 13   |

|                                                        |                                                                                        |                                                        |                                                                     |                                                                        |                                         |           |
|--------------------------------------------------------|----------------------------------------------------------------------------------------|--------------------------------------------------------|---------------------------------------------------------------------|------------------------------------------------------------------------|-----------------------------------------|-----------|
|                                                        | PS/BP/Pt or MnO <sub>2</sub> /Fe <sub>2</sub> O <sub>3</sub> microsphere               | Catalytic (H <sub>2</sub> O <sub>2</sub> )<br>Magnetic | Pt or MnO <sub>2</sub> ,<br>Fe <sub>2</sub> O <sub>3</sub>          | Velocity enhancement                                                   | -                                       | 14        |
| Xenes<br>(2D Ge)                                       | 2D Ge-GO/Pt tubular                                                                    | Catalytic (H <sub>2</sub> O <sub>2</sub> )             | Pt                                                                  | Fluorescent labeling                                                   | -                                       | 15        |
| Carbon<br>nitrides<br>(C <sub>3</sub> N <sub>4</sub> ) | Pt-gC <sub>3</sub> N <sub>4</sub> microsphere                                          | Light ( $\lambda$ = n.s.)                              | Pt-gC <sub>3</sub> N <sub>4</sub>                                   | UV-visible light-driven<br>propulsion, on-off motion                   | -                                       | 16        |
|                                                        | g-C <sub>3</sub> N <sub>4</sub> tubular                                                | Light ( $\lambda$ = 408 nm, 565<br>nm)                 | g-C <sub>3</sub> N <sub>4</sub>                                     | Visible light-driven<br>propulsion, on-off motion                      | Removal/FL sensing<br>(Heavy metals)    | 17        |
|                                                        | g-C <sub>3</sub> N <sub>4</sub> /C microsphere                                         | Light ( $\lambda$ = 420 nm)                            | g-C <sub>3</sub> N <sub>4</sub> /C                                  | Visible light-driven<br>propulsion, on-off motion,<br>photodegradation | Photodegradation<br>(RhB)               | 18        |
|                                                        | Fe/C <sub>3</sub> N <sub>4</sub> microsphere                                           | Light ( $\lambda$ = 532 nm),<br>magnetic               | Fe, C <sub>3</sub> N <sub>4</sub>                                   | Visible light-driven<br>propulsion, photodegradation                   | Photodegradation<br>(CR(VI))            | 19        |
|                                                        | Fe <sub>3</sub> O <sub>4</sub> /f-C <sub>3</sub> N <sub>4</sub> microsphere            | Light ( $\lambda$ = n.s.),<br>magnetic                 | Fe <sub>3</sub> O <sub>4</sub> ,<br>f-C <sub>3</sub> N <sub>4</sub> | Visible light-driven<br>propulsion, photodegradation                   | Photodegradation<br>(tetracycline)      | 20        |
|                                                        | g-C <sub>3</sub> N <sub>4</sub> /Fe <sub>3</sub> O <sub>4</sub> /KF tubular            | Light ( $\lambda$ = 420 nm),<br>magnetic               | g-C <sub>3</sub> N <sub>4</sub> ,<br>Fe <sub>3</sub> O <sub>4</sub> | Visible light-driven<br>propulsion, on-off motion,<br>photodegradation | Photodegradation<br>(RhB)               | 21        |
|                                                        | PLA/Grp/Al/Ga/Fe <sub>3</sub> O <sub>4</sub> /C <sub>3</sub> N <sub>4</sub><br>tubular | Catalytic (H <sub>2</sub> O <sub>2</sub> )<br>Magnetic | Al, Ga                                                              | Photocatalytic activity                                                | Photodegradation<br>(Picric acid)       | 22        |
|                                                        | PHI (CN <sub>x</sub> ) microsphere                                                     | Light ( $\lambda$ = 365 nm, 385<br>nm, 415 nm, 470 nm) | PHI (CN <sub>x</sub> )                                              | UV-visible light-driven<br>propulsion, photocharging                   | Controlled drug release,<br>FL tracking | 23,<br>24 |
| MPX <sub>3</sub><br>(MnPS <sub>3</sub> )               | MnPS3-Fe <sub>3</sub> O <sub>4</sub> 2D sheet                                          | Rotational magnetic<br>field                           | Fe <sub>3</sub> O <sub>4</sub>                                      | Photocatalytic activity                                                | Photodegradation<br>(CPS, RhB)          | 25        |

Abbreviations: As, arsenene; BP, black phosphorus; CPS, chlorpyrifos; E. coli, Escherichia coli; FL, fluorescence; Ge, germanene; GO, graphene oxide; Grp, graphene; KF, kapok fiber; LPS, lipopolysaccharide; n.s., not specified; PANI, polyaniline; PCL, polycaprolactone; PHI, poly(heptazine imide); PS, polystyrene; RhB, Rhodamine B; TNT, trinitrotoluene.

**Table S2.** ZIF type MOF-based micro/nanorobots

|                              | Composition and types                                                                                    | Powering mechanisms (Sources)                         | Active component             | Maneuverability        | MOF functionalities                                                           | Application (targets)                            | Ref. |
|------------------------------|----------------------------------------------------------------------------------------------------------|-------------------------------------------------------|------------------------------|------------------------|-------------------------------------------------------------------------------|--------------------------------------------------|------|
| ZIF-8                        | Fe <sub>3</sub> O <sub>4</sub> /Fe/ZIF/Pt microrods                                                      | Catalytic (H <sub>2</sub> O <sub>2</sub> )            | Pt                           | Magnetic guidance      | Porous crystalline framework                                                  | Water treatment (Uranium)                        | 26   |
|                              | ZIF microhelices                                                                                         | Rotational magnetic field                             | Ni                           | Magnetic steering      | Porous crystalline framework<br>Biocompatibility<br>pH-responsive degradation | Drug delivery                                    | 27   |
|                              | UCNPs/TAPP/ZIF-8/Catalase/GOx particles                                                                  | Catalytic (H <sub>2</sub> O <sub>2</sub> )            | Catalase                     | -                      | Porous crystalline framework<br>Biocompatibility                              | Cancer cell therapy                              | 28   |
|                              | KF/c-Fe <sub>2</sub> O <sub>3</sub> /c-Al <sub>2</sub> O <sub>3</sub> /MnO <sub>2</sub> /ZIF-8 microtube | Catalytic propulsion (H <sub>2</sub> O <sub>2</sub> ) | MnO <sub>2</sub>             | Magnetic guidance      | Porous crystalline framework                                                  | Water treatment (CR, DOC)                        | 29   |
|                              | Fe/ZIF-8/GelMA microhelices                                                                              | Rotational magnetic field                             | Fe                           | Magnetic steering      | Porous crystalline framework<br>Biocompatibility<br>pH-responsive degradation | Drug delivery                                    | 30   |
| ZIF-67                       | ZIF-8/ZIF-67 Janus crystals                                                                              | Catalytic (H <sub>2</sub> O <sub>2</sub> )            | ZIF-67 (Co-site)             | -                      | Catalytic activity                                                            | n.s.                                             | 31   |
|                              | ZIF-67/Fe <sub>3</sub> O <sub>4</sub> particles                                                          | Catalytic (H <sub>2</sub> O <sub>2</sub> )            | ZIF-67 (Co)                  | Magnetic guidance      | Catalytic activity<br>Porous crystalline framework                            | Drug delivery                                    | 32   |
|                              | ZIF-67 particles                                                                                         | Catalytic (H <sub>2</sub> O <sub>2</sub> )            | ZIF-67                       | -                      | Catalytic activity<br>Porous crystalline framework                            | Drug delivery                                    | 33   |
|                              | ZIF-67/TPM Janus particles                                                                               | Light-triggered ionic self-diffusiophoresis           | ZIF-67                       | -                      | Catalytic activity<br>Porous crystalline framework                            | Water treatment (Hg)                             | 34   |
| ZIF-L                        | cat-β/ZIF particles                                                                                      | Catalytic (H <sub>2</sub> O <sub>2</sub> )            | Catalase                     | pH-regulated speed     | Porous crystalline framework<br>Biocompatibility                              | Drug delivery                                    | 35   |
|                              | CAT-PDPA/ZIF-L particles                                                                                 | Catalytic (H <sub>2</sub> O <sub>2</sub> )            | Catalase                     | pH-controlled buoyancy | Porous crystalline framework<br>Biocompatibility                              | Drug delivery in 3D cell culture                 | 36   |
| ZIF-8, ZIF-67, ZIF-90, MOF-5 | MOF/Au Janus particles                                                                                   | Self-diffusiophoresis, self-disintegration in water   | ZIF-8, ZIF-67, ZIF-90, MOF-5 | -                      | Porous crystalline framework<br>Self-disintegration behavior                  | Antibacterial therapy (E. coli)<br>Wound healing | 37   |

Abbreviations: CAT, catalase; CR, congo red; DOC, doxycycline; DOX, doxorubicin; GOx, glucose oxidase; n.s., not specified; PDPA, poly (2-diisopropylamino)ethyl methacrylate; PS, polystyrene; TAPP, 5,10,15,20-tetrakis(4-aminophenyl)porphyrin; TPM, 3-trimethoxysilyl propyl methacrylate; UCNPs, upconversion nanoparticles; ZIF, Zeolitic imidazolate framework.

**Table S3.** UiO type MOF-based micro/nanorobots

|                 | Composition and types                                   | Powering mechanisms (Sources)              | Active component | Maneuverability                                                        | MOF functionalities          | Application (targets)         | Ref. |
|-----------------|---------------------------------------------------------|--------------------------------------------|------------------|------------------------------------------------------------------------|------------------------------|-------------------------------|------|
| UiO-66          | Fe <sub>3</sub> O <sub>4</sub> /UiO-66/Pt colloidosomes | Catalytic (H <sub>2</sub> O <sub>2</sub> ) | Pt               | Magnetic guidance                                                      | Porous crystalline framework | Water treatment (MO, Cr (VI)) | 38   |
| UiO-67          | UiO-67-Co(bpy) particles<br>UiO-67-Mn(bpy) particles    | Catalytic (H <sub>2</sub> O <sub>2</sub> ) | Co, Mn           | Chemically controllable speed<br>(Deceleration by chelation, IDA/EDTA) | Porous crystalline framework | n.s.                          | 39   |
| UiO-type Zr-fcu | Zr-fcu-azo/sti-30% crystals                             | Catalytic (H <sub>2</sub> O <sub>2</sub> ) | Catalase         | -                                                                      | Porous crystalline framework | Water treatment (RhB)         | 40   |

Abbreviations: EDTA, ethylenediaminetetraacetic acid; IDA, iminodiacetic acid; MO, methyl orange; n.s., not specified; RhB, Rhodamine B; UiO, University of Oslo.

**Table S4.** MIL type MOF-based micro/nanorobots

|                                                     | Composition and types                                                  | Powering mechanisms (Sources)                | Active component               | Maneuverability     | MOF functionalities                                                         | Application (targets)                  | Ref. |
|-----------------------------------------------------|------------------------------------------------------------------------|----------------------------------------------|--------------------------------|---------------------|-----------------------------------------------------------------------------|----------------------------------------|------|
| MIL-100(Fe), MIL-125NH <sub>2</sub> , UiO-66, ZIF-8 | S. platensis/Fe <sub>3</sub> O <sub>4</sub> /Gelatin/ MOF microhelices | Rotational magnetic field                    | Fe <sub>3</sub> O <sub>4</sub> | Magnetic steering   | Porous crystalline framework<br>Biocompatibility<br>Photocatalytic activity | Drug delivery<br>Water treatment (RhB) | 41   |
| MIL-88B                                             | MIL-88B/PPy/MB crystals                                                | Self-diffusiophoresis and thermal convection | MIL/PPy/MB                     | pH-regulated motion | Porous crystalline framework<br>Photocatalytic activity                     | Cancer cell therapy                    | 42   |

Abbreviations: DOX, doxorubicin; MB, methylene blue; MIL, Materials Institute Lavoisier; PPy, polypyrrole; RhB, Rhodamine B; S. platensis, Spirulina platensis.

**Table S5.** Semiconducting metal oxides-based micro/nanorobots

| Metal oxides                  | Fabrication techniques                           | Composition              | Backbone material             | $E_g$ (eV) | Wavelength (nm) | Semiconductor functionalities                      | Application         | Ref. |
|-------------------------------|--------------------------------------------------|--------------------------|-------------------------------|------------|-----------------|----------------------------------------------------|---------------------|------|
| ZnO                           | Templated–assisted ALD                           | ZnO/Pt                   | ZnO microtubes                | ~3.2-3.4   | 200-360/390     | Light-responsiveness                               | n.s.                | 43   |
|                               | Templated–assisted ALD/electrodeposition         | ZnO/Ni                   | ZnO microtubes                |            |                 | Light-driven propulsion                            | n.s.                | 44   |
|                               | Chemical precipitation/heat treatment/PVD        | ZnO/ZnO <sub>2</sub> /Pt | ZnO microspheres              |            |                 | Photocatalytic activity<br>Light-driven propulsion | Water treatment     | 45   |
|                               | Chemical precipitation/heat treatment/PVD        | ZnO/TiO <sub>2</sub> /Pt | ZnO microspheres              |            |                 | Light-driven propulsion                            | n.s.                | 46   |
|                               | Chemical precipitation/PVD                       | ZnO/Pt                   | ZnO microparticles            |            |                 | Photocatalytic activity<br>Light-driven propulsion | Water treatment     | 47   |
|                               | Hydrothermal reaction/sputtering                 | ZnO/Au                   | ZnO microrods                 |            |                 | Light-driven propulsion                            | n.s.                | 48   |
|                               | Hydrothermal reaction/annealing/sputtering       | ZnO/Pt                   | Hollow ZnO microspheres       |            |                 | Light-driven propulsion<br>Phototactic motion      | Cargo delivery      | 49   |
|                               | Hydrothermal reaction/calcination                | ZnO/ZnO <sub>2</sub>     | Yolk-shell ZnO microparticles |            |                 | Light-driven propulsion                            | n.s.                | 50   |
|                               | Hydrothermal reaction                            | ZnO/Ag                   | ZnO microstars                |            |                 | Photocatalytic activity<br>Light-driven propulsion | Biofilm eradication | 51   |
|                               | Chemical precipitation                           | ZnO/Au                   | ZnO microstars                |            |                 | Photocatalytic activity<br>Light-driven propulsion | Water treatment     | 52   |
|                               | Hydrothermal reaction/polymerization             | ZnO/Polysiloxane         | ZnO microrods                 |            |                 | Photocatalytic activity<br>Light-driven propulsion | Water treatment     | 53   |
|                               | Hydrothermal reaction/etching/E-beam evaporation | ZnO/Pt                   | ZnO microrods                 |            |                 | Photocatalytic activity<br>Light-driven propulsion | Water treatment     | 54   |
| FTS/sputtering/annealing/HVPE | GaN/ZnO:Au                                       | ZnO microneedles         | Light-driven propulsion       | n.s.       | 55              |                                                    |                     |      |

|                                |                                                                               |                                                                      |                                                 |          |             |                                                    |                 |        |
|--------------------------------|-------------------------------------------------------------------------------|----------------------------------------------------------------------|-------------------------------------------------|----------|-------------|----------------------------------------------------|-----------------|--------|
| WO <sub>3</sub>                | n.s.                                                                          | Galistan/WO <sub>3</sub>                                             | Galistan liquid metal marbles                   |          |             | Light-driven propulsion                            | n.s.            | 56     |
|                                | Hydrothermal reaction/calcination/sputtering                                  | C/WO <sub>3</sub> /Au                                                | Carbon microspheres                             | ~2.4-2.8 | 200-440/520 | Photocatalytic activity<br>Light-driven propulsion | Water treatment | 57     |
|                                | Hydrothermal reaction/calcination                                             | WO <sub>3</sub>                                                      | WO <sub>3</sub> microspheres                    |          |             | Photocatalytic activity<br>Light-driven propulsion | Water treatment | 58     |
| Fe <sub>2</sub> O <sub>3</sub> | Hydrothermal reaction/sputtering                                              | Fe <sub>2</sub> O <sub>3</sub> /metal                                | Fe <sub>2</sub> O <sub>3</sub> microspheres     |          |             | Photocatalytic activity<br>Light-driven propulsion | Water treatment | 59     |
|                                | Chemical precipitation                                                        | α-Fe <sub>2</sub> O <sub>3</sub>                                     | α-Fe <sub>2</sub> O <sub>3</sub> microparticles |          |             | Phototactic motion<br>Active assembly              | n.s.            | 60     |
|                                | Gel-sol methodology/polymerization                                            | Fe <sub>2</sub> O <sub>3</sub> /PTPM                                 | Fe <sub>2</sub> O <sub>3</sub> microspheres     |          |             | Light-driven propulsion                            | n.s.            | 61     |
|                                | Gel-sol methodology/polymerization                                            | Fe <sub>2</sub> O <sub>3</sub> /polysiloxane                         | Fe <sub>2</sub> O <sub>3</sub> microparticles   | ~1.9-2.2 | 200-560/650 | Phototactic motion<br>Active assembly              | n.s.            | 62     |
|                                | Hydrothermal reaction/sputtering                                              | Fe <sub>2</sub> O <sub>3</sub> /Pt                                   | Fe <sub>2</sub> O <sub>3</sub> microspheres     |          |             | Photocatalytic activity<br>Light-driven propulsion | Water treatment | 63     |
|                                | Templated-assisted gel-sol method/ hydrothermal reaction/surface modification | MnO <sub>2</sub> /SiO <sub>2</sub> /γ-Fe <sub>2</sub> O <sub>3</sub> | SiO <sub>2</sub> microtubes                     |          |             | Photocatalytic activity<br>Light-driven propulsion | Water treatment | 64     |
|                                | Hydrothermal reaction/wet chemistry                                           | Halloysite/α-Fe <sub>2</sub> O <sub>3</sub> /Ag                      | Halloysite nanotubes                            |          |             | Photocatalytic activity<br>Light-driven propulsion | Water treatment | 65     |
| β-FeOOH                        | PVD/ hydrolysis                                                               | PS/β-FeOOH/AgCl/Ag                                                   | PS microspheres                                 | ~2.0-2.5 | 200-500/620 | Light-driven propulsion                            | n.s.            | 66, 67 |
| Cu <sub>2</sub> O              | Chemical precipitation/sputtering                                             | Cu <sub>2</sub> O/Au                                                 | Cu <sub>2</sub> O microspheres                  |          |             | Light-driven propulsion                            | n.s.            | 68     |
|                                | E-beam/annealing                                                              | SiO <sub>2</sub> /TiO <sub>2</sub> /Cu <sub>2</sub> O                | SiO <sub>2</sub> microspheres                   | ~1.9-2.2 | 200-560/650 | Light-driven propulsion                            | n.s.            | 69     |
|                                | Chemical precipitation                                                        | Cu <sub>2</sub> O/N-CNT                                              | Cu <sub>2</sub> O microspheres                  |          |             | Light-driven propulsion<br>Phototactic motion      | n.s.            | 70     |



|                         |                                                |                                   |                                                   |          |             |                                                    |                     |    |
|-------------------------|------------------------------------------------|-----------------------------------|---------------------------------------------------|----------|-------------|----------------------------------------------------|---------------------|----|
|                         | Chemical precipitation                         | $\text{Cu}_{2+1}\text{O}$         | $\text{Cu}_{2+1}\text{O}$ microparticles          | ~1.54    | 200-800     | Light-driven propulsion                            | n.s.                | 71 |
| $\text{Cu}_2\text{O}$   | Chemical precipitation/calcination             | $\text{Cu}_2\text{O}$             | $\text{Cu}_2\text{O}$ truncated micro-octahedrons | ~1.9-2.2 | 200-560/650 | Light-driven propulsion                            | n.s.                | 72 |
|                         | Hydrothermal reaction                          | $\text{Cu}_2\text{O}$             | Hollow $\text{Cu}_2\text{O}$ microspheres         |          |             | Photocatalytic activity<br>Light-driven propulsion | Biofilm eradication | 73 |
| $\text{Rh}_2\text{O}_3$ | Templated-assisted electrodeposition/annealing | $\text{Rh}_2\text{O}_3\text{-Au}$ | $\text{Rh}_2\text{O}_3\text{-Au}$ microrods       | ~1.41    | 200-880     | Light-driven propulsion<br>Phototactic motion      | n.s.                | 74 |

Abbreviations: ALD, atomic layer deposition; FTS, flame transport synthesis; HVPE, hydride vapor phase epitaxy; N-CNT, N-doped carbon nanotubes; n.s., not specified; PS, polystyrene; PTPM, poly (3-methylthienyl methacrylate); PVD, physical vapor deposition.

**Table S6.** Semiconducting ternary metal oxides-based micro/nanorobots

| Ternary metal oxides            | Fabrication techniques                                  | Composition                                                                                              | Backbone material                                      | $E_g$ (eV) | Wavelength (nm) | Semiconductor functionalities                      | Application                               | Ref. |
|---------------------------------|---------------------------------------------------------|----------------------------------------------------------------------------------------------------------|--------------------------------------------------------|------------|-----------------|----------------------------------------------------|-------------------------------------------|------|
| BiOX                            | Templated-assisted PED/UV oxidation                     | CoNi/Bi <sub>2</sub> O <sub>3</sub> /BiOCl                                                               | Bi <sub>2</sub> O <sub>3</sub> /BiOCl microtubes       | ~3.60      | 180-360         | Photocatalytic activity                            | Water treatment                           | 75   |
|                                 | Self-assembly process/chemical precipitation            | Chlorella cells/Fe <sub>3</sub> O <sub>4</sub> /BiOCl                                                    | Chlorella cells                                        |            |                 | Photocatalytic activity                            | Water treatment<br>Bacterial inactivation | 76   |
|                                 | Solvothermal method/photoreduction                      | Fe <sub>0.11</sub> Bi <sub>0.89</sub> OBr/Fe <sub>3</sub> O <sub>4</sub> /Mn <sub>3</sub> O <sub>4</sub> | Fe <sub>0.11</sub> Bi <sub>0.89</sub> OBr microspheres | ~2.9       | 200-430         | Photocatalytic activity                            | Water treatment                           | 77   |
|                                 | Chemical precipitation/sputtering                       | BiOI/Au                                                                                                  | BiOI microspheres                                      | ~1.7       | 200-700         | Light-driven propulsion                            | n.s.                                      | 78   |
|                                 | Hydrothermal reaction/chemical precipitation/sputtering | BiOI/AgI/Fe <sub>3</sub> O <sub>4</sub> /Au                                                              | BiOI microspheres                                      |            |                 | Photocatalytic activity<br>Light-driven propulsion | Water treatment                           | 79   |
|                                 | Chemical precipitation/electrostatic interaction        | BiOI/Fe <sub>3</sub> O <sub>4</sub>                                                                      | BiOI microspheres                                      |            |                 | Photocatalytic activity                            | Water treatment                           | 80   |
|                                 | Co-precipitation method                                 | BiOI/Fe <sub>3</sub> O <sub>4</sub>                                                                      | BiOI microflakes                                       |            |                 | Photocatalytic activity<br>Light-driven propulsion | Water treatment                           | 81   |
|                                 | Templated-assisted electrodeposition                    | rGO/ZnO/BiOI/Co-Pi/Pt                                                                                    | rGO microtubes                                         |            |                 | Photocatalytic activity                            | Water treatment                           | 82   |
| Bi <sub>2</sub> WO <sub>6</sub> | Hydrothermal reaction/calcination                       | Bi <sub>2</sub> WO <sub>6</sub>                                                                          | Bi <sub>2</sub> WO <sub>6</sub> microspheres           | ~2.8       | 200-440         | Photocatalytic activity<br>Light-driven propulsion | Environmental remediation                 | 83   |
| BiVO <sub>4</sub>               | Coprecipitation method/hydrothermal reaction            | BiVO <sub>4</sub>                                                                                        | BiVO <sub>4</sub> microstars                           | ~2.4       | 200-520         | Photocatalytic activity<br>Light-driven propulsion | Bacterial inactivation                    | 84   |
|                                 | Solvothermal method                                     | BiVO <sub>4</sub>                                                                                        | BiVO <sub>4</sub> microsquares                         |            |                 | Light-driven propulsion                            | n.s.                                      | 85   |

|                                                                        |                                                  |                                                   |                                                    |                                   |        |
|------------------------------------------------------------------------|--------------------------------------------------|---------------------------------------------------|----------------------------------------------------|-----------------------------------|--------|
| Solvothermal method                                                    | $\text{BiVO}_4$                                  | $\text{BiVO}_4$ microspheroids                    | Light-driven propulsion<br>Active assembly         | n.s.                              | 86     |
| Coprecipitation method/hydrothermal reaction                           | $\text{BiVO}_4$                                  | $\text{BiVO}_4$ microspheres with concave defects | Photocatalytic activity<br>Light-driven propulsion | Therapeutics                      | 87     |
| Hydrothermal reaction                                                  | $\text{BiVO}_4$                                  | $\text{BiVO}_4$ microrods                         | Photocatalytic activity<br>Light-driven propulsion | Water treatment                   | 88     |
| Hydrothermal reaction                                                  | $\text{BiVO}_4/\text{GO}$                        | $\text{BiVO}_4/\text{GO}$ microspheres            | Photocatalytic activity<br>Light-driven propulsion | Water treatment                   | 88     |
| Coprecipitation method/hydrothermal reaction/electrostatic interaction | $\text{BiVO}_4/\text{Fe}_3\text{O}_4$            | $\text{BiVO}_4$ microstars                        | Photocatalytic activity<br>Light-driven propulsion | Food treatment<br>Water treatment | 89, 90 |
| Coprecipitation method/hydrothermal reaction/electrostatic interaction | $\text{PEI}/\text{Fe}_3\text{O}_4/\text{BiVO}_4$ | $\text{PEI}/\text{Fe}_3\text{O}_4$ clusters       | Photocatalytic activity                            | Biofilm eradication               | 91     |

Abbreviations: GO, graphene oxide; n.s., not specified; PED, pulse electrodeposition; PEI, polyethylenimine.

**Table S7.** Semiconducting quantum dot (QD)- and metal chalcogenide-based micro/nanorobots

| Ternary metal oxides | Fabrication techniques                                                     | Composition                                                  | Backbone material                             | $E_g$ (eV) | Wavelength (nm) | Semiconductor functionalities                      | Application     | Ref. |
|----------------------|----------------------------------------------------------------------------|--------------------------------------------------------------|-----------------------------------------------|------------|-----------------|----------------------------------------------------|-----------------|------|
| QDs                  | Templated–assisted electrodeposition                                       | ZnS or CdS QDs/PANI/Pt                                       | PANI/Pt microtubes                            | ~3.8       | 200-330         | Photocatalytic activity                            | Water treatment | 92   |
|                      | Templated–assisted electrodeposition                                       | CdS QDs/C <sub>60</sub> /Pt, Pd or MnO <sub>2</sub>          | C <sub>60</sub> microtubes                    | ~2.9       | 200-430         | Light-responsiveness                               | n.s.            | 93   |
|                      | Oil–in–water emulsion                                                      | CdTe@ZnS or CdSe@ZnS QDs/Fe <sub>3</sub> O <sub>4</sub> /PCL | PCL shells                                    | ~2.3       | 200-540         | Photocatalytic activity<br>Light-driven propulsion | Water treatment | 94   |
|                      | Oil–in–water emulsion                                                      | CdSe@ZnS/Fe <sub>3</sub> O <sub>4</sub> /PCL/PLGA            | PCL/PLGA shells                               | n.s.       | n.s.            | Photocatalytic activity<br>Light-driven propulsion | Water treatment | 95   |
|                      | Chemical precipitation/in–situ deposition                                  | Cu <sub>2</sub> O/CdSe                                       | Cu <sub>2</sub> O truncated micro–octahedrons | ~2.3       | 200-540         | Light-driven propulsion                            | Water treatment | 96   |
|                      | Hydrothermal reaction                                                      | Cu <sub>2</sub> O/PbS                                        | Cu <sub>2</sub> O micro–octahedrons           | ~0.6-1.6   | IR              | Light-driven propulsion<br>Fluorescence            | n.s.            | 38   |
| No QDs               | Hydrothermal reaction/ion–exchange reaction/in–situ deposition/ALD/etching | TiO <sub>2</sub> /Fe <sub>3</sub> O <sub>4</sub> /CdS        | CdS microtubes                                | ~2.9       | 200-430         | Photocatalytic activity<br>Light-driven propulsion | Water treatment | 97   |
|                      | Microwave reaction                                                         | Sb <sub>2</sub> S <sub>3</sub>                               | Sb <sub>2</sub> S <sub>3</sub> microrods      | ~1.6-1.8   | 200-680/700     | Photocatalytic activity<br>Light-driven propulsion | Water treatment | 98   |
|                      | PVD/ALD                                                                    | Sb <sub>2</sub> Se <sub>3</sub> /ZnO                         | Sb <sub>2</sub> Se <sub>3</sub> nanowires     | ~1.6       | 200-700         | Light-driven propulsion                            | n.s.            | 99   |

|                                                |                           |                            |            |             |                                                    |                         |     |
|------------------------------------------------|---------------------------|----------------------------|------------|-------------|----------------------------------------------------|-------------------------|-----|
|                                                |                           |                            |            |             |                                                    | Polarotactic navigation |     |
| PVD/cation exchange reaction /sputtering       | $Zn_xCd_{1-x}Se/Cu_2S/Pt$ | $Zn_xCd_{1-x}Se$ nanowires | ~1.7-2.7   | 200-460/730 | Light-driven propulsion                            | n.s.                    | 100 |
| Hydrothermal reaction/sputtering               | $CuS/Fe_3O_4/Pt$          | $CuS$ microspheres         | ~2.1       | 200-600     | Phototactic motion<br>Photocatalytic activity      | Water treatment         | 101 |
| Hydrothermal reaction/photochemical deposition | $ZnIn_2S_4/Pt$            | $ZnIn_2S_4$ microspheres   | ~2.08-2.48 | 200-500/600 | Photocatalytic activity<br>Light-driven propulsion | Water treatment         | 102 |

Abbreviations: ALD, atomic layer deposition; n.s., not specified; PANI, polyaniline; PCL, polycaprolactone; PLGA, polylactic-co-glycolic acid; PVD, physical vapor deposition.

**Table S8.** Polymer-based micro/nanorobots

|                           | Polymer types                                 | Actuation sources                                          | Polymer functionalities                                     | Application                                       | Ref. |
|---------------------------|-----------------------------------------------|------------------------------------------------------------|-------------------------------------------------------------|---------------------------------------------------|------|
| Smart responsive polymers | PNIPAM-co-ABP-AAc                             | Magnetic field, temperature                                | Remote-controlled capture, transport, and release           | Sperm cell delivery                               | 103  |
|                           | PNIPAM                                        | Catalytic (H <sub>2</sub> O <sub>2</sub> ), temperature    | Temperature-controlled speed regulation                     | n.s.                                              | 104  |
|                           | PTBC                                          | Rotational magnetic field, temperature                     | Pick up and dispose of chemicals                            | Water treatment (arsenic, atrazine)               | 105  |
|                           | PDPA                                          | Catalytic (H <sub>2</sub> O <sub>2</sub> ), pH             | pH-controlled buoyancy                                      | Drug delivery in 3D cell culture                  | 36   |
|                           | Liquid-crystal elastomers with azobenzene dye | Light                                                      | Light-controlled motion                                     | n.s.                                              | 106  |
|                           | pNIPAM, pNIPAM-AAc                            | Rotational magnetic field, temperature, pH                 | Temperature/pH-responsive structural change                 | on-demand active cargo delivery                   | 107  |
| Porous organic polymers   | Py-Azine COF                                  | Catalytic (H <sub>2</sub> O <sub>2</sub> ), magnetic field | Fluorescent labeling                                        | Sensing (TNP)                                     | 108  |
|                           | TAPB-PDA-COF<br>TpAzo-COF                     | Light                                                      | Light-driven propulsion<br>Biocompatibility<br>Drug loading | Drug delivery                                     | 109  |
|                           | porphyrin-COF                                 | Light                                                      | Light-driven propulsion<br>Biocompatibility                 | Cancer therapy                                    | 110  |
|                           | Conjugated organic polymeric networks         | Light                                                      | Light-driven propulsion<br>Photocatalytic activity          | Photodegradation (RhB, MB, MO)<br>pH chemosensors | 111  |
|                           | Conjugated organic polymeric networks         | Light                                                      | Light-driven propulsion<br>Photocatalytic activity          | Photodegradation (MDMA)                           | 112  |
| Conductive polymers       | PANI                                          | Catalytic (H <sub>2</sub> O <sub>2</sub> )                 | Conductive carrier layer                                    | On-demand circuit configuration                   | 8    |
|                           | PPy                                           | Catalytic (H <sub>2</sub> O <sub>2</sub> ), magnetic field | Programmable surface property                               | Water treatment ( $\alpha$ -oestradiol)           | 113  |

|  |       |                                                        |                               |                     |             |
|--|-------|--------------------------------------------------------|-------------------------------|---------------------|-------------|
|  | PPy   | Light                                                  | Programmable surface property | Cancer cell therapy | 42          |
|  | PEDOT | Catalytic (H <sub>2</sub> O <sub>2</sub> ), ultrasound | Conductive carrier layer      | n.s.                | 114,<br>115 |

Abbreviations: COF, covalent organic frameworks; MB, methylene blue; MDMA, 3,4-methylenedioxymethamphetamine; MO, methyl orange; n.s., not specified; PANI, polyaniline; PDPA, poly (2-diisopropylamino)ethyl methacrylate; PEDOT, poly(3,4-ethylene dioxythiophene); pNIPAM-AAc, poly N-isopropylacrylamide acrylic acid; PNIPAM-co-ABP-AAc, poly(N-isopropylacrylamide)-co-acryloylbenzophenone-co-(acrylic acid); PNIPAM, poly(N-isopropyl acrylamide); PPy, polypyrrole; PTBC, pluronic tri-block copolymer; RhB, rhodamine B; TNP, 2,4,6-trinitrophenol.

**Table S9.** Biological cell hybrid micro/nanorobots

| Types of biological cells | Species                                  | Propulsion and navigation              | Functional hybrid                                   | Applications                | Ref.     |
|---------------------------|------------------------------------------|----------------------------------------|-----------------------------------------------------|-----------------------------|----------|
| MTB                       | <i>M. magneticum</i> strain AMB-1        | Autonomous + magnetotaxis              |                                                     |                             | 116, 117 |
|                           | <i>M. magneticum</i> strain AMB-1        | Autonomous + magnetotaxis              |                                                     | Organic compound removal    |          |
|                           | <i>M. magneticum</i> strain AMB-1        | Autonomous + magnetotaxis              | Fe <sub>3</sub> O <sub>4</sub> NPs                  |                             | 118      |
|                           | <i>M. magneticum</i> strain AMB-1        | Autonomous + magnetotaxis              | Photosensitizer NPs                                 | Cancer therapy              | 119      |
|                           | <i>M. magneticum</i> strain AMB-1        | Autonomous + magnetotaxis              |                                                     | Drug delivery               | 120      |
|                           | <i>Magnetococcus marinus</i> MC-1        | Autonomous + magnetotaxis              | Liposomes                                           | Drug delivery               | 121      |
|                           | <i>M. gryphiswaldense</i> MRS-1          | Autonomous + magnetotaxis              | Mesoporous silica microtube                         | Biofilm eradication         | 122      |
| E. Coli.                  | <i>E. coli</i> MG1655                    | Autonomous                             | Liposome microparticles                             | Drug delivery               | 123      |
|                           | <i>E. coli</i> MG1655                    | Autonomous + magnetotaxis              | RBC/Fe <sub>3</sub> O <sub>4</sub> NPs              | Drug delivery               | 124      |
|                           | <i>E. coli</i> MG1655                    | Autonomous + chemotaxis + magnetotaxis | PEM-MNP microparticles                              | Drug delivery               | 125      |
| Mammalian cell            | C2C12 myoblast                           | Electric pulse stimulation             | PDMS-based hydrogel                                 |                             | 126      |
|                           | Embryonic stem cells and C2C12 myoblasts | External light stimuli                 | PDMS scaffold                                       |                             | 127      |
|                           | C2C12 myoblast                           | Bio-actuator                           | Polymer-based Flexible 3D Printed Bio-Bot Skeletons |                             | 128      |
|                           | Mesenchymal stem cells                   | Extrinsic (magnetic)                   | PLGA microscaffold with magnetic cluster            | Knee cartilage regeneration | 129      |



|              |                                             |                           |                                                              |                                          |     |
|--------------|---------------------------------------------|---------------------------|--------------------------------------------------------------|------------------------------------------|-----|
|              | PC12 cells                                  | Magnetotaxis              | Piezoelectric magnetic microswimmer                          | Targeted cell therapy                    | 130 |
|              | Macrophage                                  | Extrinsic (magnetic)      | PLGA-DTX- Fe <sub>3</sub> O <sub>4</sub> NPs                 | Cancer Therapy                           | 131 |
| Sperm        | Bovine sperm cells                          | Magnetotaxis              | Tetrapod microstructures                                     | Drug delivery                            | 132 |
|              | Bull sperm cells                            | Magnetotaxis              | Magnetic microtubes                                          | Drug delivery                            | 133 |
|              | Bovine sperm cells                          | Magnetotaxis              | Fe <sub>2</sub> O <sub>3</sub> particles                     | Drug delivery                            | 134 |
|              | Human sperm                                 | Magnetotaxis              | CPT-coated magnetic cap                                      | Cancer therapy                           | 135 |
|              | Bovine sperm cells                          | Magnetotaxis              | 4D printed sperm microcarriers via two-photon polymerization | Assisted fertilization                   | 136 |
|              | Bovine sperm cells                          | Magnetotaxis              | Iron oxide-polystyrene composite particles                   | Assisted fertilization                   | 137 |
| Microalgae   | <i>C. reinhardtii</i>                       | Autonomous                | ACE2 receptor                                                | Pathogen removal                         | 138 |
|              | <i>C. reinhardtii</i>                       | Autonomous                | Antibiotic polymeric NPs                                     | Drug delivery                            | 139 |
|              | <i>C. reinhardtii</i>                       | Autonomous + magnetotaxis | Magnetic PS microparticles                                   | Drug delivery                            | 140 |
|              | <i>C. reinhardtii</i>                       | Autonomous + phototaxis   | Chitosan–nanoparticle matrix                                 | Drug delivery                            | 141 |
|              | Spirulina                                   | Magnetotaxis              | Fe <sub>3</sub> O <sub>4</sub> NPs                           | Drug delivery, Imaging                   | 142 |
| Pollen/spore | Sunflower sporopollenin exine capsule       | Extrinsic (chemical)      | Pt layer                                                     | Heavy metal removal                      | 143 |
|              | Pollen grains (dandelion, pine, lotus, etc) | Extrinsic (chemical)      | Pt layer                                                     | Environmental remediation/ drug delivery | 144 |

|              |                         |                      |                                                 |                          |     |
|--------------|-------------------------|----------------------|-------------------------------------------------|--------------------------|-----|
|              | Sunflower pollen        | Extrinsic (magnetic) | Au/Co/Au layer                                  | Cancer therapy           | 145 |
|              | Sunflower pollen        | Extrinsic (magnetic) | Magnetic liquid metal droplets                  | Biofilm eradication      | 146 |
|              | Fungi spore             | External (Magnetic)  | Fe <sub>3</sub> O <sub>4</sub> NPs              | Heavy metal removal      | 147 |
|              | Ganoderma lucidum spore | External (Magnetic)  | Fe <sub>3</sub> O <sub>4</sub> NPs /Carbon dots | Pathogen removal         | 148 |
| Plant callus | Tomato callus           | Extrinsic (magnetic) | Fe <sub>3</sub> O <sub>4</sub> NPs              | Drug delivery            | 149 |
|              | Tomato callus           | Extrinsic (magnetic) | Fe <sub>3</sub> O <sub>4</sub> NPs              | Organic compound removal | 150 |

Abbreviations: ACE2, angiotensin-converting enzyme 2; *C. reinhardtii*, Chlamydomonas reinhardtii; *E. coli*, Escherichia coli; *M. gryphiswaldense* MRS-1, Magnetospirillum gryphiswaldense MSR-1; *M. magneticum* strain AMB-1, Magnetospirillum magneticum strain AMB-1; MNP, magnetite nanoparticles; PEM, polyelectrolyte multilayer; PS, polystyrene.

**Table S10.** Advanced material-based micro/nanorobots: various designs, fabrication techniques, and size ranges

| Design                       | Composition                                                                                                    | Fabrication techniques                       | Size        | Ref. |
|------------------------------|----------------------------------------------------------------------------------------------------------------|----------------------------------------------|-------------|------|
| Synthetic advanced materials | ZIF-67 particles                                                                                               | In situ biomineralization                    | 140 nm      | 33   |
|                              | As-Pt 2D sheet                                                                                                 | Sputtering                                   | 200-500 nm  | 11   |
|                              | TABP-PDA-COF particles                                                                                         | Chemical method                              | 452 ± 74 nm | 109  |
|                              | WO <sub>3</sub> microparticles                                                                                 | Hydrothermal reaction/calcination            | 1-2 μm      | 58   |
|                              | MOF/Au Janus particles                                                                                         | Chemical method                              | 1.6-3 μm    | 37   |
|                              | MnPS <sub>3</sub> -Fe <sub>3</sub> O <sub>4</sub> 2D sheets                                                    | Electrostatic assembly                       | 2-5 μm      | 25   |
|                              | Bi <sub>2</sub> WO <sub>6</sub> microspheres                                                                   | Hydrothermal reaction/calcination            | ~7 μm       | 83   |
|                              | BiVO <sub>4</sub> microstars                                                                                   | Coprecipitation method/hydrothermal reaction | 4-8 μm      | 84   |
|                              | Zr-fcu-azo/sti-30% crystals                                                                                    | Chemical method                              | 5-10 μm     | 40   |
|                              | Ti <sub>3</sub> C <sub>2</sub> T <sub>x</sub> -Pt/TiO <sub>2</sub> /γ-Fe <sub>2</sub> O <sub>3</sub> 2D sheets | Thermal annealing/e-beam evaporation         | 5-10 μm     | 10   |
| Microsphere robots           | PHI (CN <sub>x</sub> )/Pt, PHI (CN <sub>x</sub> )/Au                                                           | Thermal polymerization/sputtering            | 1-3 μm      | 23   |
|                              | MoS <sub>2</sub> /TiO <sub>2</sub>                                                                             | E-beam evaporation                           | 1-4.5 μm    | 2    |
|                              | PHI (CN <sub>x</sub> )                                                                                         | Thermal polymerization                       | 1-5 μm      | 24   |
|                              | Fe <sub>3</sub> O <sub>4</sub> /f-C <sub>3</sub> N <sub>4</sub>                                                | Thermal polymerization/solvothermal          | 5-10 μm     | 20   |

|                       |                                                                       |                                                       |                            |          |
|-----------------------|-----------------------------------------------------------------------|-------------------------------------------------------|----------------------------|----------|
|                       | Fe <sub>3</sub> O <sub>4</sub> /UiO-66/Pt colloidosomes               | Transient Pickering emulsion method                   | 5-10 μm                    | 38       |
|                       | PCL/WS <sub>2</sub> /Pt/Fe                                            | Oil-water emulsion                                    | ~20 μm                     | 6        |
|                       | PS/Au/BP                                                              | Sputtering/Au-S bonding                               | ~20 μm                     | 13<br>14 |
|                       | CdSe@ZnS/Fe <sub>3</sub> O <sub>4</sub> /PCL/<br>PLGA                 | Oil-in-water emulsion                                 | 10-25 μm                   | 94       |
| Tubular robots        | Conjugated organic polymeric networks                                 | Sol-gel method/Glaser-type polycondensation reactions | d: 2.5 μm, L:~17.5 μm      | 112      |
|                       | MoS <sub>2</sub> /Pt, MoS <sub>2</sub> /Au                            | Template-assisted electrodeposition                   | d: 5 μm, L:~20 μm          | 1        |
|                       | g-C <sub>3</sub> N <sub>4</sub> /Fe <sub>3</sub> O <sub>4</sub> /KF   | Thermal polymerization/chemical reduction             | d: ~20 μm, L:>50 μm        | 21       |
|                       | g-C <sub>3</sub> N <sub>4</sub>                                       | Hydrothermal reaction/calcination                     | d: 9.7±1.5 μm, L: 67±14 μm | 17       |
| Helical robots        | S. platensis/Fe <sub>3</sub> O <sub>4</sub> /MoS <sub>2</sub> /<br>Au | Biotemplating/hydrothermal reaction                   | ~50 μm                     | 3        |
|                       | Fe/ZIF-8/GelMA microhelices                                           | Two-photon polymerization stereolithography           | 50-100 μm                  | 30       |
| Biohybrid microrobots | Macrophage                                                            | Cell culture                                          | 300 nm                     | 131      |
|                       | <i>E. coli</i> MG1655                                                 | Bacteria culture                                      | 2 μm                       | 124      |
|                       | <i>E. coli</i> MG1655                                                 | Bacteria culture                                      | 2 μm                       | 125      |
|                       | <i>M. magneticum</i> strain AMB-1                                     | Bacteria culture                                      | 2.5 μm                     | 120      |
|                       | <i>M. magneticum</i> strain AMB-1                                     | Bacteria culture                                      | 3 μm                       | 119      |

|  |                                             |                                          |           |     |
|--|---------------------------------------------|------------------------------------------|-----------|-----|
|  | <i>C. reinhardtii</i>                       | Microalgae Culture                       | 10 µm     | 139 |
|  | <i>C. reinhardtii</i>                       | Microalgae Culture                       | 10 µm     | 140 |
|  | Pollen grains (dandelion, pine, lotus, etc) | Natural products (commercial)/Sputtering | 22-62 µm  | 144 |
|  | Tomato callus                               | Callus cultivation                       | 30–70 µm  | 150 |
|  | Bovine sperm cells                          | Incubation                               | 60–70 µm  | 134 |
|  | Bovine sperm cells                          | Incubation                               | 60–70 µm  | 136 |
|  | Mesenchymal stem cells                      | Cell culture                             | 357.55 µm | 129 |

Abbreviations: As, arsenene; COF, covalent organic frameworks; GelMA, gelatin methacryloyl; PHI, poly(heptazine imide); S. platensis, Spirulina platensis; ZIF: zeolitic imidazolate framework.

**Table S11.** Advanced material-based micro/nanorobots: comparison of speed by different energy sources

| Energy sources | Propulsion mechanism                    | Type                                                                                                                    | Size ( $\mu\text{m}$ ) | Speed ( $\mu\text{m/s}$ ) | Speed (body length/s) | Ref. |
|----------------|-----------------------------------------|-------------------------------------------------------------------------------------------------------------------------|------------------------|---------------------------|-----------------------|------|
| Catalytic      | Catalytic, bubble propulsion            | Zr-fcu-azo/sti-30% crystals                                                                                             | 7.5                    |                           | 4                     | 40   |
|                | Catalytic, ionic diffusiophoresis       | MOF/Au Janus particles                                                                                                  | 2                      | 17.2                      | 8.6                   | 37   |
|                | Catalytic, bubble propulsion            | MoS <sub>2</sub> /Pt microtubes                                                                                         | 10                     | 370                       | 37                    | 1    |
|                | Catalytic, bubble propulsion            | ZIF-67 particles                                                                                                        | 0.14                   | 8                         | 57                    | 33   |
|                | Catalytic, bubble propulsion            | Fe <sub>3</sub> O <sub>4</sub> /UiO-66/Pt colloidosomes                                                                 | 7.5                    | 450                       | 60                    | 38   |
|                | Catalytic, bubble propulsion            | PANI/Pt microtubes                                                                                                      | 8                      | 3000                      | 375                   | 151  |
| Light          | Light, self-diffusiophoresis            | Conjugated organic polymer microtubes                                                                                   | 17.5                   | 7.04                      | 0.4                   | 112  |
|                | Light, photocatalytic bubble propulsion | g-C <sub>3</sub> N <sub>4</sub> microtubes                                                                              | 67                     | 72                        | 1.1                   | 17   |
|                | Light, self-electrophoresis             | BiVO <sub>4</sub> microspheres                                                                                          | 5.1                    |                           | 1.1                   | 87   |
|                | Light, self-electrophoresis             | Ti <sub>3</sub> C <sub>2</sub> T <sub>x</sub> -Pt/TiO <sub>2</sub> / $\gamma$ -Fe <sub>2</sub> O <sub>3</sub> 2D sheets | 7.5                    | 16                        | 2.1                   | 10   |
|                | Light, photocatalytic                   | PHI (CN <sub>x</sub> ) microparticles                                                                                   | 2.5                    | 23                        | 9.5                   | 24   |
|                | Light, photocatalytic                   | TABP-PDA-COF particles                                                                                                  | 0.452                  | 16.4                      | 36                    | 109  |
|                | Light, photothermal                     | WS <sub>2</sub> microparticles                                                                                          | 0.8                    | 6000                      | 7500                  | 4    |
| Magnetic       | Magnetic, tumbling                      | MnPS <sub>3</sub> -Fe <sub>3</sub> O <sub>4</sub> 2D sheets                                                             | 3                      | 4.9                       | 1.6                   | 25   |

|            |                            |                                                                              |       |       |      |     |
|------------|----------------------------|------------------------------------------------------------------------------|-------|-------|------|-----|
|            | Magnetic, tumbling         | Fe <sub>3</sub> O <sub>4</sub> /Bi <sub>2</sub> O <sub>3</sub> /Ag microrods | 6.9   | 13.2  | 1.9  | 152 |
|            | Magnetic, corkscrew motion | ZIF microhelices                                                             | 25    | 50    | 2    | 27  |
|            | Magnetic, tumbling         | pNIPAM/ pNIPAM-AAc/FePt microparticles                                       | 120   | 532   | 4.4  | 107 |
| Acoustic   | Ultrasound                 | PPy microrods                                                                | 5     | 30    | 6    | 153 |
|            | Ultrasound                 | Au/Ru/Pt nanorods                                                            | 2     | 200   | 100  | 154 |
|            | Ultrasound                 | Au/Ru/Rh nanorods                                                            | 2     | 200   | 100  | 155 |
|            | Ultrasound                 | Bubble-carried PEDOT/MnO <sub>2</sub> microtubes                             | 10    | 50000 | 5000 | 115 |
| Biohybrids | Extrinsic (magnetic)       | Mesenchymal stem cells                                                       | 357.6 | 2.88  | 0.01 | 129 |
|            | Magnetotaxis               | Bovine sperm cells                                                           | 60    | 6.8   | 0.11 | 134 |
|            | Extrinsic (magnetic)       | Tomato callus                                                                | 50    | 6.02  | 0.12 | 150 |
|            | Magnetotaxis               | Bovine sperm cells                                                           | 60    | 7     | 0.17 | 136 |
|            | Autonomous + magnetotaxis  | <i>M. magneticum</i> strain AMB-1                                            | 3     | 13.3  | 4.4  | 119 |
|            | Extrinsic (chemical)       | Pollen grains (dandelion, pine, lotus, etc)                                  | 42    | 200   | 4.8  | 144 |
|            | Autonomous + magnetotaxis  | <i>E. coli</i> MG1655                                                        | 2     | 10.2  | 5.1  | 124 |
|            | Autonomous + magnetotaxis  | <i>C. reinhardtii</i>                                                        | 10    | 51.44 | 5.1  | 140 |

|                                        |                                   |     |       |      |     |
|----------------------------------------|-----------------------------------|-----|-------|------|-----|
| Autonomous + magnetotaxis              | <i>M. magneticum</i> strain AMB-1 | 2.5 | 20.5  | 8.2  | 120 |
| Autonomous                             | <i>C. reinhardtii</i>             | 10  | 104.6 | 10.5 | 139 |
| Autonomous + chemotaxis + magnetotaxis | <i>E. coli</i> MG1655             | 2   | 22.5  | 11.3 | 125 |

Abbreviations: COF, covalent organic frameworks; E. coli, Escherichia coli; PHI, poly(heptazine imide); pNIPAM-AAc, poly N-isopropylacrylamide acrylic acid; PNIPAM, poly(N-isopropyl acrylamide); PPy, polypyrrole; ZIF: zeolitic imidazolate framework.



## Supplementary References

1. V. V. Singh, K. Kaufmann, B. E. F. de Ávila, E. Karshalev and J. Wang, *Advanced Functional Materials*, 2016, **26**, 6270-6278.
2. Y. Huang, J. Guo, Y. Li, H. Li and D. E. Fan, *Advanced Materials*, 2022, **34**, 2203082.
3. V. de la Asunción-Nadal, C. Franco, A. Veciana, S. Ning, A. Terzopoulou, S. Sevim, X. Z. Chen, D. Gong, J. Cai and P. D. Wendel-García, *Small*, 2022, **18**, 2203821.
4. V. de la Asunción-Nadal, D. Rojas, B. Jurado-Sánchez and A. Escarpa, *Journal of Materials Chemistry A*, 2023, **11**, 1239-1245.
5. V. c. d. la Asunción-Nadal, M. Pacheco, B. Jurado-Sanchez and A. Escarpa, *Analytical Chemistry*, 2020, **92**, 9188-9193.
6. M. Pacheco, V. de la Asunción-Nadal, B. Jurado-Sánchez and A. Escarpa, *Biosensors and Bioelectronics*, 2020, **165**, 112286.
7. V. de la Asunción-Nadal, B. Jurado-Sánchez, L. Vázquez and A. Escarpa, *Chemical Science*, 2020, **11**, 132-140.
8. C. C. Mayorga-Martinez, J. G. S. Moo, B. Khezri, P. Song, A. C. Fisher, Z. Sofer and M. Pumera, *Advanced Functional Materials*, 2016, **26**, 6662-6667.
9. C. C. Mayorga-Martinez, J. Vyskočil, F. Novotný and M. Pumera, *Journal of Materials Chemistry A*, 2021, **9**, 14904-14910.
10. M. Urso, M. Ussia, F. Novotný and M. Pumera, *Nature Communications*, 2022, **13**, 3573.
11. N. F. Rosli, C. C. Mayorga-Martinez, A. C. Fisher, O. Alduhaish, R. D. Webster and M. Pumera, *Applied Materials Today*, 2020, **21**, 100819.
12. T. Maric, J. G. S. Moo, B. Khezri, Z. Sofer and M. Pumera, *Applied Materials Today*, 2017, **9**, 289-291.
13. K. Yuan, M. A. n. López, B. Jurado-Sanchez and A. Escarpa, *ACS Applied Materials & Interfaces*, 2020, **12**, 46588-46597.
14. K. Yuan, V. de la Asuncion-Nadal, B. Jurado-Sanchez and A. Escarpa, *Chemistry of Materials*, 2020, **32**, 1983-1992.
15. T. Maric, S. M. Beladi-Mousavi, B. Khezri, J. Sturala, M. Z. M. Nasir, R. D. Webster, Z. Sofer and M. Pumera, *Small*, 2020, **16**, 1902365.
16. Z. Ye, Y. Sun, H. Zhang, B. Song and B. Dong, *Nanoscale*, 2017, **9**, 18516-18522.
17. K. Villa, C. L. Manzanares Palenzuela, Z. Sofer, S. Matějková and M. Pumera, *ACS Nano*, 2018, **12**, 12482-12491.
18. X. Song, Y. Tao, J. Liu, J. Lin, P. Dai, Q. Wang, W. Li, W. Chen and C. Zheng, *RSC Advances*, 2022, **12**, 13116-13126.
19. M. P. Rayaroth, D. Oh, C.-S. Lee, N. Kumari, I. S. Lee and Y.-S. Chang, *Journal of Colloid and Interface Science*, 2021, **597**, 94-103.
20. K. Feng, J. Gong, J. Qu and R. Niu, *ACS Applied Materials & Interfaces*, 2022, **14**, 44271-44281.
21. C. Zheng, X. Song, Q. Gan and J. Lin, *Journal of Colloid and Interface Science*, 2023, **630**, 121-133.
22. B. Khezri, K. Villa, F. Novotný, Z. Sofer and M. Pumera, *Small*, 2020, **16**, 2002111.
23. V. Sridhar, F. Podjaski, J. Kröger, A. Jiménez-Solano, B.-W. Park, B. V. Lotsch and M. Sitti, *Proceedings of the National Academy of Sciences*, 2020, **117**, 24748-24756.
24. V. Sridhar, F. Podjaski, Y. Alapan, J. Kröger, L. Grunenberg, V. Kishore, B. V. Lotsch and M. Sitti, *Science Robotics*, 2022, **7**, eabm1421.
25. J. Kim, C. C. Mayorga-Martinez and M. Pumera, *Chemical Engineering Journal*, 2022, **446**, 137342.
26. Y. Ying, A. M. Pourrahimi, Z. Sofer, S. Matějková and M. Pumera, *ACS Nano*, 2019, **13**, 11477-11487.
27. X. Wang, X. Z. Chen, C. C. Alcântara, S. Sevim, M. Hoop, A. Terzopoulou, C. De Marco, C. Hu, A. J. de Mello and P. Falcaro, *Advanced Materials*, 2019, **31**, 1901592.
28. Y. You, D. Xu, X. Pan and X. Ma, *Applied Materials Today*, 2019, **16**, 508-517.

29. J. Liu, J. Li, G. Wang, W. Yang, J. Yang and Y. Liu, *Journal of Colloid and Interface Science*, 2019, **555**, 234-244.
30. A. Terzopoulou, X. Wang, X. Z. Chen, M. Palacios-Corella, C. Pujante, J. Herrero-Martín, X. H. Qin, J. Sort, A. J. deMello and B. J. Nelson, *Advanced Healthcare Materials*, 2020, **9**, 2001031.
31. T. T. Tan, J. T. Cham, M. R. Reithofer, T. A. Hor and J. M. Chin, *Chemical Communications*, 2014, **50**, 15175-15178.
32. L. Wang, H. Zhu, Y. Shi, Y. Ge, X. Feng, R. Liu, Y. Li, Y. Ma and L. Wang, *Nanoscale*, 2018, **10**, 11384-11391.
33. X. Peng, S. Tang, D. Tang, D. Zhou, Y. Li, Q. Chen, F. Wan, H. Lukas, H. Han and X. Zhang, *Science Advances*, 2023, **9**, eadh1736.
34. M. Ikram, F. Hu, G. Peng, M. Basharat, N. Jabeen, K. Pan and Y. Gao, *ACS Applied Materials & Interfaces*, 2021, **13**, 51799-51806.
35. S. Gao, J. Hou, J. Zeng, J. J. Richardson, Z. Gu, X. Gao, D. Li, M. Gao, D. W. Wang and P. Chen, *Advanced Functional Materials*, 2019, **29**, 1808900.
36. Z. Guo, T. Wang, A. Rawal, J. Hou, Z. Cao, H. Zhang, J. Xu, Z. Gu, V. Chen and K. Liang, *Materials Today*, 2019, **28**, 10-16.
37. X. Liu, X. Sun, Y. Peng, Y. Wang, D. Xu, W. Chen, W. Wang, X. Yan and X. Ma, *ACS Nano*, 2022, **16**, 14666-14678.
38. H. Huang, J. Li, M. Yuan, H. Yang, Y. Zhao, Y. Ying and S. Wang, *Angewandte Chemie International Edition*, 2022, **61**, e202211163.
39. J. Li, X. Yu, M. Xu, W. Liu, E. Sandraz, H. Lan, J. Wang and S. M. Cohen, *Journal of the American Chemical Society*, 2017, **139**, 611-614.
40. Y. Yang, X. Arqué, T. Patiño, V. Guillerme, P.-R. Bliersch, J. Pérez-Carvajal, I. Imaz, D. MasPOCH and S. Sánchez, *Journal of the American Chemical Society*, 2020, **142**, 20962-20967.
41. A. Terzopoulou, M. Palacios-Corella, C. Franco, S. Sevim, T. Dysli, F. Mushtaq, M. Romero-Angel, C. Martí-Gastaldo, D. Gong and J. Cai, *Advanced Functional Materials*, 2022, **32**, 2107421.
42. L. Dekanovsky, Y. Ying, J. Zelenka, J. Plutnar, S. M. Beladi-Mousavi, I. Křížová, F. Novotný, T. Ruml and M. Pumera, *Advanced Functional Materials*, 2022, **32**, 2205062.
43. R. Dong, C. Wang, Q. Wang, A. Pei, X. She, Y. Zhang and Y. Cai, *Nanoscale*, 2017, **9**, 15027-15032.
44. C. Wang, R. Dong, Q. Wang, C. Zhang, X. She, J. Wang and Y. Cai, *Chemistry—An Asian Journal*, 2019, **14**, 2485-2490.
45. A. M. Pourrahimi, K. Villa, Y. Ying, Z. Sofer and M. Pumera, *ACS Applied Materials & Interfaces*, 2018, **10**, 42688-42697.
46. A. M. Pourrahimi, K. Villa, Z. Sofer and M. Pumera, *Small Methods*, 2019, **3**, 1900258.
47. A. M. Pourrahimi, K. Villa, C. L. Manzanares Palenzuela, Y. Ying, Z. Sofer and M. Pumera, *Advanced Functional Materials*, 2019, **29**, 1808678.
48. S. Du, H. Wang, C. Zhou, W. Wang and Z. Zhang, *Journal of the American Chemical Society*, 2020, **142**, 2213-2217.
49. X. He, H. Jiang, J. Li, Y. Ma, B. Fu and C. Hu, *Small*, 2021, **17**, 2101388.
50. L. Wang, M. Borrelli and J. Simmchen, *ChemPhotoChem*, 2021, **5**, 933-939.
51. M. Ussia, M. Urso, K. Dolezelikova, H. Michalkova, V. Adam and M. Pumera, *Advanced Functional Materials*, 2021, **31**, 2101178.
52. C. M. Oral, M. Ussia and M. Pumera, *Small*, 2022, **18**, 2202600.
53. X. Zhang, W. Xie, S. Du, H. Wang and Z. Zhang, *Langmuir*, 2022, **38**, 4389-4395.
54. Y. Ying, A. M. Pourrahimi, C. L. Manzanares-Palenzuela, F. Novotny, Z. Sofer and M. Pumera, *Small*, 2020, **16**, 1902944.
55. N. Wolff, V. Ciobanu, M. Enachi, M. Kamp, T. Braniste, V. Duppel, S. Shree, S. Raevschi, M. Medina-Sanchez, R. Adelung, O. G. Schmidt, L. Kienle and I. Tiginyanu, *Small*, 2020, **16**, e1905141.
56. X. K. Tang, S. Y. Tang, V. Sivan, W. Zhang, A. Mitchell, K. Kalantar-zadeh and K. Khoshmanesh, *Appl Phys Lett*, 2013, **103**, 174104.

57. Q. Zhang, R. Dong, Y. Wu, W. Gao, Z. He and B. Ren, *ACS Appl Mater Interfaces*, 2017, **9**, 4674-4683.
58. X. Peng, M. Urso and M. Pumera, *Npj Clean Water*, 2023, **6**, 21.
59. M. Urso, M. Ussia and M. Pumera, *Adv. Funct. Mater*, 2021, **31**, 2101510.
60. Z. H. Lin, T. Y. Si, Z. G. Wu, C. Y. Gao, X. K. Lin and Q. He, *Angew Chem Int Edit*, 2017, **56**, 13517-13520.
61. J. Zhu, H. G. Wang and Z. X. Zhang, *Langmuir*, 2021, **37**, 4964-4970.
62. N. Kang, J. Zhu, X. L. Zhang, H. G. Wang and Z. X. Zhang, *Journal of the American Chemical Society*, 2022, **144**, 4754-4758.
63. X. Peng, M. Urso and M. Pumera, *Small Methods*, 2021, **5**, 2100617.
64. K. Villa, J. Parmar, D. Vilela and S. Sánchez, *Acs Applied Materials & Interfaces*, 2018, **10**, 20478-20486.
65. J. Wang, J. W. Si, Y. Z. Hao, J. Y. Li, P. P. Zhang, C. X. Zuo, B. Jin, Y. Wang, W. Zhang, W. Q. Li, R. F. Guo and S. D. Miao, *Langmuir*, 2022, **38**, 1231-1242.
66. T. Huang, B. Ibarlucea, A. Caspari, A. Synytska, G. Cuniberti, J. de Graaf and L. Baraban, *Eur Phys J E*, 2021, **44**, 39.
67. T. Huang, V. Misko, A. Caspari, A. Synytska, B. Ibarlucea, F. Nori, J. Fassbender, G. Cuniberti, D. Makarov and L. Baraban, *Commun Mater*, 2022, **3**, 60.
68. D. K. Zhou, Y. C. Li, P. T. Xu, N. S. McCool, L. Q. Li, W. Wang and T. E. Mallouk, *Nanoscale*, 2017, **9**, 1315-1315.
69. É. O'Neel-Judy, D. Nicholls, J. Castañeda and J. G. Gibbs, *Small*, 2018, **14**, 1801860.
70. Q. L. Wang, R. F. Dong, C. Wang, S. Y. Xu, D. C. Chen, Y. Y. Liang, B. Y. Ren, W. Gao and Y. P. Cai, *ACS Applied Materials & Interfaces*, 2019, **11**, 6201-6207.
71. Q. L. Wang, R. F. Dong, Q. X. Yang, J. J. Wang, S. Y. Xu and Y. P. Cai, *Nanoscale Horiz*, 2020, **5**, 325-330.
72. W. J. Liu, X. Chen, X. Y. Ding, Q. Long, X. L. Lu, Q. Wang and Z. W. Gu, *Nanoscale Horiz*, 2021, **6**, 238-244.
73. H. X. Tan, B. Chen, M. H. Liu, J. M. Jiang, J. F. Ou, L. Liu, F. Wang, Y. C. Ye, J. B. Gao, J. Sun, F. Peng and Y. F. Tu, *Chem Eng J*, 2022, **448**, 137689.
74. D. H. Cui, X. L. Lyu, S. F. Duan, Y. X. Peng and W. Wang, *Acs Appl Nano Mater*, 2022, **5**, 14235-14240.
75. F. Mushtaq, M. Guerrero, M. S. Sakar, M. Hoop, A. M. Lindo, J. Sort, X. Z. Chen, B. J. Nelson, E. Pellicer and S. Pané, *J Mater Chem A*, 2015, **3**, 23670-23676.
76. L. Xu, D. Gong, N. Celi, J. J. Xu, D. Y. Zhang and J. Cai, *Appl Surf Sci*, 2022, **579**, 152165.
77. Y. Liu, J. Li, J. Y. Li, X. H. Yan, F. D. Wang, W. N. Yang, D. H. L. Ng and J. Yang, *J Clean Prod*, 2020, **252**, 119573.
78. R. F. Dong, Y. Hu, Y. F. Wu, W. Gao, B. Y. Ren, Q. L. Wang and Y. P. Cai, *Journal of the American Chemical Society*, 2017, **139**, 1722-1725.
79. Z. H. Zhan, F. N. Wei, J. H. Zheng, C. Yin, W. G. Yang, L. G. Yao, S. S. Tang and D. Liu, *Mater Lett*, 2020, **258**, 126825.
80. P. Mayorga-Burrezo, C. C. Mayorga-Martinez, J. Kim and M. Pumera, *Chem Eng J*, 2022, **446**, 137139.
81. K. Khairudin, N. F. A. Bakar and M. S. Osman, *J Environ Chem Eng*, 2022, **10**, 108275.
82. H. J. Zhou, B. Wu, L. Dekanovsky, S. Y. Wei, B. Khezri, T. Hartman, J. H. Li and Z. Sofer, *FlatChem*, 2021, **30**, 100294.
83. K. Villa, L. Dekanovsky, J. Plutnar, J. Kosina and M. Pumera, *Advanced Functional Materials*, 2020, **30**, 2007073.
84. K. Villa, F. Novotny, J. Zelenka, M. P. Browne, T. Ruml and M. Pumera, *ACS Nano*, 2019, **13**, 8135-8145.
85. S. Heckel and J. Simmchen, *Advanced Intelligent Systems*, 2019, **1**, 1900093.
86. S. Heckel, J. Grauer, M. Semmler, T. Gemming, H. Löwen, B. Liebchen and J. Simmchen, *Langmuir*, 2020, **36**, 12473-12480.

87. P. Mayorga-Burrezo, C. C. Mayorga-Martinez and M. Pumera, *Advanced Functional Materials*, 2022, **32**, 2106699.
88. Z. C. Chen, J. W. Jiang, X. Wang, H. Zhang, B. Song and B. Dong, *J Mater Sci*, 2022, **57**, 4092-4103.
89. K. Villa, J. Vyskocil, Y. L. Ying, J. Zelenka and M. Pumera, *Chem-Eur J*, 2020, **26**, 3039-3043.
90. S. M. Beladi-Mousavi, S. Hermanová, Y. L. Ying, J. Plutnar and M. Pumera, *Acs Applied Materials & Interfaces*, 2021, **13**, 25102-25110.
91. C. C. Mayorga-Martinez, J. Zelenka, K. Klima, P. Mayorga-Burrezo, L. Hoang, T. Ruml and M. Pumera, *ACS Nano*, 2022, **16**, 8694-8703.
92. B. Jurado-Sánchez, J. Wang and A. Escarpa, *Acs Applied Materials & Interfaces*, 2016, **8**, 19618-19625.
93. R. M. Hormigos, B. J. Sánchez and A. Escarpa, *Angew Chem Int Edit*, 2019, **58**, 3128-3132.
94. M. Pacheco, B. Jurado-Sánchez and A. Escarpa, *Angew Chem Int Edit*, 2019, **58**, 18017-18024.
95. M. Pacheco, B. Jurado-Sánchez and A. Escarpa, *Nanoscale*, 2021, **13**, 17106-17115.
96. X. Chen, X. Y. Ding, Y. L. Liu, J. Li, W. J. Liu, X. L. Lu and Z. W. Gu, *Appl Mater Today*, 2021, **25**, 101200.
97. Y. L. Ying, J. Plutnar and M. Pumera, *Small*, 2021, **17**, 2101665.
98. A. Jancik-Prochazkova and M. Pumera, *Nanoscale*, 2023, **15**, 5726-5734.
99. X. J. Zhan, J. Zheng, Y. Zhao, B. R. Zhu, R. Cheng, J. Z. Wang, J. Liu, J. Tang and J. Y. Tang, *Adv Mater*, 2019, **31**, 1903329.
100. J. Zheng, J. Z. Wang, Z. Xiong, Z. H. Wan, X. J. Zhan, S. Y. Yang, J. W. Chen, J. Dai and J. Y. Tang, *Advanced Functional Materials*, 2019, **29**, 1901768.
101. E. H. Ma, K. Wang, Z. Q. Hu and H. Wang, *J Colloid Interf Sci*, 2021, **603**, 685-694.
102. H. Zhang, X. Hu, T. Li, Y. Zhang, H. Xu, Y. Sun, X. Gu, C. Gu, J. Luo and B. Gao, *Journal of Hazardous Materials*, 2022, **429**, 128271.
103. V. Magdanz, M. Guix, F. Hebenstreit and O. G. Schmidt, *Advanced Materials*, 2016, **28**, 4084-4089.
104. Y. Tu, F. Peng, X. Sui, Y. Men, P. B. White, J. C. van Hest and D. A. Wilson, *Nature Chemistry*, 2017, **9**, 480-486.
105. J. V. Vaghasiya, C. C. Mayorga-Martinez, S. Matějková and M. Pumera, *Nature Communications*, 2022, **13**, 1026.
106. S. Palagi, A. G. Mark, S. Y. Reigh, K. Melde, T. Qiu, H. Zeng, C. Parmeggiani, D. Martella, A. Sanchez-Castillo and N. Kapernaum, *Nature Materials*, 2016, **15**, 647-653.
107. Y. W. Lee, J. K. Kim, U. Bozuyuk, N. O. Dogan, M. T. A. Khan, A. Shiva, A. M. Wild and M. Sitti, *Advanced Materials*, 2023, **35**, 2209812.
108. K. Wang, W. Wang, S. Pan, Y. Fu, B. Dong and H. Wang, *Applied Materials Today*, 2020, **19**, 100550.
109. V. Sridhar, E. Yildiz, A. Rodríguez-Camargo, X. Lyu, L. Yao, P. Wrede, A. Aghakhani, B. M. Akolpoglu, F. Podjaski and B. V. Lotsch, *Advanced Materials*, 2023, 2301126.
110. J. Feng, S. P. Yang, Y. Q. Shao, Y. Y. Sun, Z. L. He, Y. Wang, Y. N. Zhai and Y. B. Dong, *Advanced Healthcare Materials*, 2023, **12**, 2301645.
111. Y. S. Kochergin, K. Villa, F. Novotný, J. Plutnar, M. J. Bojdys and M. Pumera, *Advanced Functional Materials*, 2020, **30**, 2002701.
112. Y. S. Kochergin, K. Villa, A. Nemeskalova, M. Kuchař and M. Pumera, *ACS Nano*, 2021, **15**, 18458-18468.
113. L. Dekanovsky, B. Khezri, Z. Rottnerova, F. Novotny, J. Plutnar and M. Pumera, *Nature Machine Intelligence*, 2020, **2**, 711-718.
114. T. Xu, F. Soto, W. Gao, V. Garcia-Gradilla, J. Li, X. Zhang and J. Wang, *Journal of the American Chemical Society*, 2014, **136**, 8552-8555.
115. X. Lu, H. Shen, Y. Wei, H. Ge, J. Wang, H. Peng and W. Liu, *Small*, 2020, **16**, 2003678.
116. S. Rismani Yazdi, R. Nosrati, C. A. Stevens, D. Vogel, P. L. Davies and C. Escobedo, *Small*, 2018, **14**, 1702982.

117. S.-J. Song, C. C. Mayorga-Martinez, J. Vyskočil, M. Castoralova, T. s. Ruml and M. Pumera, *ACS Applied Materials & Interfaces*, 2023, **15**, 7023-7029.
118. Q. Li, H. Chen, X. Feng, C. Yu, F. Feng, Y. Chai, P. Lu, T. Song, X. Wang and L. Yao, *Small*, 2019, **15**, 1900427.
119. J. Xing, T. Yin, S. Li, T. Xu, A. Ma, Z. Chen, Y. Luo, Z. Lai, Y. Lv and H. Pan, *Advanced Functional Materials*, 2021, **31**, 2008262.
120. S. Schuerle, A. P. Soleimany, T. Yeh, G. Anand, M. Häberli, H. Fleming, N. Mirkhani, F. Qiu, S. Hauert and X. Wang, *Science Advances*, 2019, **5**, eaav4803.
121. S. Taherkhani, M. Mohammadi, J. Daoud, S. Martel and M. Tabrizian, *ACS Nano*, 2014, **8**, 5049-5060.
122. M. M. Stanton, B.-W. Park, D. Vilela, K. Bente, D. Faivre, M. Sitti and S. Sánchez, *ACS Nano*, 2017, **11**, 9968-9978.
123. B. Mostaghaci, O. Yasa, J. Zhuang and M. Sitti, *Advanced Science*, 2017, **4**, 1700058.
124. Y. Alapan, O. Yasa, O. Schauer, J. Giltinan, A. F. Tabak, V. Sourjik and M. Sitti, *Science Robotics*, 2018, **3**, eaar4423.
125. B.-W. Park, J. Zhuang, O. Yasa and M. Sitti, *ACS Nano*, 2017, **11**, 8910-8923.
126. M. Guix, R. Mestre, T. Patiño, M. De Corato, J. Fuentes, G. Zarpellon and S. Sánchez, *Science Robotics*, 2021, **6**, eabe7577.
127. O. Aydin, X. T. Zhang, S. Nuethong, G. J. Pagan-Diaz, R. Bashir, M. Gazzola and M. T. A. Saif, *P Natl Acad Sci USA*, 2019, **116**, 19841-19847.
128. R. Raman, C. Cvetkovic, S. G. M. Uzel, R. J. Platt, P. Sengupta, R. D. Kamm and R. Bashir, *P Natl Acad Sci USA*, 2016, **113**, 3497-3502.
129. G. Go, S. G. Jeong, A. Yoo, J. Han, B. Kang, S. Kim, T. K. Nguyen, Z. Jin, C. S. Kim, Y. R. Seo, J. Y. Kang, J. Y. Na, E. K. Song, Y. Jeong, J. K. Seon, J. O. Park and E. Choi, *Science Robotics*, 2020, **5**, eaay6626.
130. X. Z. Chen, J. H. Liu, M. Dong, L. Müller, G. Chatzipirpiridis, C. Z. Hu, A. Terzopoulou, H. Torlakcik, X. P. Wang, F. Mushtaq, J. Puigmartí-Luis, Q. D. Shen, B. J. Nelson and S. Pané, *Mater Horiz*, 2019, **6**, 1512-1516.
131. J. Han, J. Zhen, V. D. Nguyen, G. Go, Y. Choi, S. Y. Ko, J. O. Park and S. Park, *Scientific Reports*, 2016, **6**, 28717.
132. H. F. Xu, M. Medina-Sánchez, V. Magdanz, L. Schwarz, F. Hebenstreit and O. G. Schmidt, *ACS Nano*, 2018, **12**, 327-337.
133. V. Magdanz, S. Sanchez and O. G. Schmidt, *Advanced Materials*, 2013, **25**, 6581-6588.
134. V. Magdanz, I. S. M. Khalil, J. Simmchen, G. P. Furtado, S. Mohanty, J. Gebauer, H. F. Xu, A. Klingner, A. Aziz, M. Medina-Sánchez, O. G. Schmidt and S. Misra, *Science Advances*, 2020, **6**, eaba5855.
135. H. F. Xu, M. Medina-Sánchez, W. N. Zhang, M. P. H. Seaton, D. R. Brison, R. J. Edmondson, S. S. Taylor, L. Nelson, K. Zeng, S. Bagley, C. Ribeiro, L. P. Restrepo, E. Lucena, C. K. Schmidt and O. G. Schmidt, *Nanoscale*, 2020, **12**, 20467-20481.
136. F. Rajabasadi, S. Moreno, K. Fichna, A. Aziz, D. Appelhans, O. G. Schmidt and M. Medina-Sánchez, *Advanced Materials*, 2022, **34**, 2204257.
137. F. Striggow, C. Ribeiro, A. Aziz, R. Nauber, F. Hebenstreit, O. G. Schmidt and M. Medina-Sanchez, *Small*, 2024, **20**, 2310288.
138. F. Zhang, Z. Li, L. Yin, Q. Zhang, N. Askarinam, R. Mundaca-Urbe, F. Tehrani, E. Karshalev, W. Gao and L. Zhang, *Journal of the American Chemical Society*, 2021, **143**, 12194-12201.
139. F. Zhang, J. Zhuang, Z. Li, H. Gong, B. E.-F. de Ávila, Y. Duan, Q. Zhang, J. Zhou, L. Yin and E. Karshalev, *Nature Materials*, 2022, **21**, 1324-1332.
140. O. Yasa, P. Erkoc, Y. Alapan and M. Sitti, *Advanced Materials*, 2018, **30**, 1804130.
141. M. B. Akolpoglu, N. O. Dogan, U. Bozuyuk, H. Ceylan, S. Kizilel and M. Sitti, *Advanced Science*, 2020, **7**, 2001256.

142. X. Yan, Q. Zhou, M. Vincent, Y. Deng, J. Yu, J. Xu, T. Xu, T. Tang, L. Bian and Y.-X. J. Wang, *Science Robotics*, 2017, **2**, eaaq1155.
143. H. Wang, M. G. Potroz, J. A. Jackman, B. Khezri, T. Marić, N. J. Cho and M. Pumera, *Advanced Functional Materials*, 2017, **27**, 1702338.
144. T. Maric, M. Z. M. Nasir, N. F. Rosli, M. Budanović, R. D. Webster, N. J. Cho and M. Pumera, *Advanced Functional Materials*, 2020, **30**, 2000112.
145. C. C. Mayorga-Martinez, M. Fojtů, J. Vyskočil, N. J. Cho and M. Pumera, *Advanced Functional Materials*, 2022, **32**, 2207272.
146. M. Sun, K. F. Chan, Z. Zhang, L. Wang, Q. Wang, S. Yang, S. M. Chan, P. W. Y. Chiu, J. J. Y. Sung and L. Zhang, *Advanced Materials*, 2022, **34**, 2201888.
147. Y. Zhang, K. Yan, F. Ji and L. Zhang, *Advanced Functional Materials*, 2018, **28**, 1806340.
148. Y. Zhang, L. Zhang, L. Yang, C. I. Vong, K. F. Chan, W. K. Wu, T. N. Kwong, N. W. Lo, M. Ip and S. H. Wong, *Science Advances*, 2019, **5**, eaau9650.
149. D. Huska, C. C. Mayorga-Martinez, R. Zelinka and M. Pumera, *Small*, 2022, **18**, 2200208.
150. S.-J. Song, C. C. Mayorga-Martinez, D. Huska and M. Pumera, *NPG Asia Materials*, 2022, **14**, 79.
151. W. Gao, S. Sattayasamitsathit, J. Orozco, J. Wang, *Journal of the American Chemical Society*, 2011, **133**, 11862-11864.
152. J. Kim, C. C. Mayorga-Martinez and M. Pumera, *Nat. Commun.*, 2023, **14**, 935.
153. D. Zhou, Y. Gao, J. Yang, Y. C. Li, G. Shao, G. Zhang, T. Li, L. Li, *Advanced Science*, 2018, **5**, 1800122.
154. S. Ahmed, W. Wang, L. Bai, D. T. Gentekos, M. Hoyos, T. E. Mallouk, *ACS Nano*, 2016, **10**, 4763-4769.
155. W. Wang, L. A. Castro, M. Hoyos, T. E. Mallouk, *ACS Nano*, 2012, **6**, 6122-6132.
